# Supplementary material for: Pathway-, layer- and cell-type-specific thalamic input to mouse barrel cortex
Source: eLife. 2019 Dec 20;8:e52665. doi: 10.7554/eLife.52665 (PMC6924959; doi:10.7554/eLife.52665)
Supplement: Figure 1—source data 1. [file elife-52665-fig1-data1.xlsx]

## Sheet: Sheet1
	Figure 1
				PSP amplitude (mV)				PSP amplitude (mV)
				Control	CNQX + APV			t = 0	t >= 1h
				18.025	0.398			21.432	23.583
				0.895	0.013			1.8601	2.247
				3.472	0.012			8.098	9.1937
				12.498	0.309			12.601	13.849
				5.373	0.165			23.418	18.956
				15.934	0.345			15.194	11.828
				4.619	0.24		n	6
				12.503	0.29		p value	0.68
			n	8			Two-tailed Wilcoxon signed-rank test
			p value	0.0048
			Two-tailed Wilcoxon signed-rank test
