# Supplementary material for: Pathway-, layer- and cell-type-specific thalamic input to mouse barrel cortex
Source: eLife. 2019 Dec 20;8:e52665. doi: 10.7554/eLife.52665 (PMC6924959; doi:10.7554/eLife.52665)
Supplement: Figure 2—source data 1. [file elife-52665-fig2-data1.xlsx]

## Sheet: Sheet1
	Figure 2
				PSP amplitude (mV)	Normalized amplitude	PSP slope (mV / ms)	Normalized PSP slope	Distance from pia (µm)
			L2	0.0803238	0.00996872	0.0290179	0.00949829
				0.0286737	0.0035586	0.00200465	0.000656173
				6.37945	1.14437	3.4929	1.46101	215.06
				0.145917	0.0102013	0.0237273	0.00579977	202.99
				0.691719	0.048359	0.083463	0.0204012
				0.831556	0.0581352	0.235394	0.0575383
				0.144798	0.0183377	0.0625	0.020316
				0.146837	0.0185959	0.00194575	0.000632478
				0.473287	0.0362028	0.175564	0.0313868	229.04
				1.75097	0.0966599	0.892701	0.0715429	145.38
				0.392699	0.0216784	0.140735	0.0112788	196.04
				2.04977	0.124311	1.00208	0.155944
				9.75122	0.95108	3.87017	0.757682	233.06
				27.9584	2.72691	12.0021	2.34971	222.88
				0.0709331	0.00436027	0.0505682	0.00741252	195.14
				0.36459	0.0224114	0.11716	0.0171739	228.64
				0.990609	0.0706206	0.530907	0.0779297
				1.65103	0.0844885	0.508929	0.107393	204
				0.0780867	0.00732821	0.0034814	0.000874039	182
				0.100568	0.00743022	0.00563088	0.00102167	209
				0.678469	0.0380477	0.254182	0.023818	265
				0.039297	0.0103092	0.0395833	0.0267606	236
				0.09467	0.00810168	0.00252554	0.000576565	106
				0.0917529	0.00354433	0.0375	0.0049233	127
				0.453864	0.0254545	0.116954	0.0178182	167
				2.91408	0.123064	1.14024	0.167075	246
				0.147203	0.00621647	0.0532208	0.00779824	151
				0.046528	0.00237932	0.00256215	0.000524436	146
				0.0196927	0.00176753	0.000281663	6.12679e-05	167
			mean	2.01955	0.195996	0.857864	0.186709
			median	0.36459	0.0216784	0.083463	0.0178182
			sd	5.32116	0.544553	2.30254	0.501763
			n	29	29	29	29	21
				PSP amplitude (mV)	Normalized amplitude	PSP slope (mV / ms)	Normalized PSP slope	Distance from pia (µm)
			L3	20.8008	0.818383	11.5448	1.4597	239.35
				13.3332	0.52458	5.21094	0.658858	298.3
				9.94949	0.391452	4.19085	0.52988	271.5
				6.23623	0.814323	1.25106	0.37603	318.84
				12.6237	1.64839	3.0918	0.929304	318.98
				0.639295	0.044694	0.280563	0.0685792	325.26
				5.66972	0.71803	2.36806	0.769752
				5.37692	0.680949	2.52867	0.821961
				1.49346	0.114238	0.557292	0.0996309	447.85
				23.7059	1.81332	9.82068	1.75571	449
				4.70781	0.36011	1.82247	0.325816	465.19
				12.0564	0.92222	5.3269	0.952326	347.29
				2.98948	0.16503	1.60577	0.12869	346.57
				0.355099	0.0215353	0.125355	0.0195079	279.01
				5.70893	0.346224	2.07989	0.323675	279.92
				21.2654	2.07411	11.0488	2.16307	373.45
				2.12943	0.130896	0.861121	0.126227	385.42
				2.49217	0.153194	0.775812	0.113722	383.73
				11.2173	0.799681	10.0878	1.48075
				0.79077	0.056374	0.224718	0.0329855
				4.10764	0.210201	1.5579	0.328746	348
				3.13704	0.294402	1.01453	0.254707	328
				8.21828	0.476912	3.69073	0.737487
				1.8139	0.167197	1.28437	0.335985
				11.6059	1.06978	4.18766	1.09547
				11.0947	0.622179	4.70379	0.440767	376
				0.239313	0.0627818	0.0993819	0.0671878	470
				0.0645964	0.0169463	0.0185355	0.0125311	308
				0.0748163	0.0196274	0.00491189	0.00332072	250
				9.26024	0.581495	3.72587	0.832397	305
				4.0984	0.257358	2.06027	0.460284	227
				0.590201	0.0227989	0.183036	0.0240304	261
				11.3991	0.639307	3.90532	0.594985	357
				4.08327	0.229006	1.4624	0.2228	262
				1.505	0.161792	0.355617	0.110102	291
				1.12177	0.0934074	0.258585	0.0654882	411
				0.768505	0.0639918	0.198682	0.0503174	322
				32.3606	1.36661	12.1001	1.77298	431
				15.9461	0.673415	5.86765	0.859764	352
				0.198763	0.010849	0.0620614	0.010571	429
				0.824415	0.0449987	0.267125	0.0454997	321
				3.90182	0.142896	2.71023	0.276201
				11.5705	0.591689	5.11931	1.04785	392
				0.70156	0.0629691	0.0908391	0.0197595	324
				0.211183	0.0189549	0.000432303	9.40353e-05	327
			mean	6.72087	0.45554	2.88295	0.506789
			median	4.0984	0.257358	1.60577	0.325816
			sd	7.24209	0.495785	3.32151	0.543868
			n	45	45	45	45	37
				PSP amplitude (mV)	Normalized amplitude	PSP slope (mV / ms)	Normalized PSP slope	Distance from pia (µm)
			L4	6.34829	0.787866	3.08063	1.00837	501.78
				9.76686	1.21213	3.02949	0.99163	479.3
				25.4169	1	7.90905	1	453.69
				5.57462	1	2.39074	1	520.3
				7.65818	1	3.32701	1	493.88
				15.589	1.08985	4.823	1.17891	517.7
				13.0186	0.910149	3.35916	0.821093	549.47
				4.68149	0.592877	1.94177	0.631185
				11.111	1.40712	4.21101	1.36881
				12.3469	0.944443	5.46897	0.977726	579.83
				13.7995	1.05556	5.71815	1.02227	589.86
				20.6926	1.14231	18.3471	1.47037	510.98
				15.5369	0.857693	6.60859	0.529626	505.23
				16.4891	1	6.42586	1	469
				10.7207	1.04564	5.22579	1.02308	583.29
				9.78487	0.954362	4.99004	0.976923	584.92
				14.6339	0.899548	8.25568	1.21016	559.53
				17.9022	1.10045	5.38831	0.789844	563.66
				14.0272	1	6.81264	1
				11.6503	1.12244	4.1905	1.51459
				7.39326	0.712295	0.667215	0.241155
				12.0949	1.16527	3.44253	1.24425
				6.69447	0.88476	3.67515	1.14556
				5.73651	0.758154	2.09556	0.653195
				10.2683	1.35709	3.85378	1.20124
				28.6461	1	12.906	1
				18.4454	0.943907	5.41943	1.1436	594
				20.6377	1.05609	4.05842	0.856401	549
				17.7258	1.66352	6.82445	1.71335	634
				3.58541	0.336481	1.14178	0.286654	561
				17.2323	1	5.00446	1
				18.809	1.73373	6.93206	1.81339
				2.88875	0.266272	0.713365	0.186612
				13.2487	0.978845	5.40478	0.980643	543
				13.8214	1.02116	5.61815	1.01936	613
				8.68745	0.487182	3.8649	0.362159	652
				26.9766	1.51282	17.4788	1.63784	622
				7.17246	1.88163	2.82233	1.90806	610
				0.451197	0.118368	0.135998	0.0919426	547
				14.2373	1.2184	5.38358	1.22904	569
				9.13319	0.781601	3.37707	0.770963	551
				23.4903	1.47507	6.67768	1.49186	607
				12.2029	0.766281	3.18753	0.712125	568
				12.0814	0.758651	3.56303	0.796015	520
				26.0362	1.00575	10.3446	1.35812	601
				25.0729	0.968541	10.5934	1.39079	613
				26.5527	1.02571	1.91251	0.25109	567
				26.2824	1.47402	9.86359	1.50274	584
				17.9853	1.00869	6.51256	0.992206	538
				9.2235	0.51729	3.31502	0.505051	544
				10.4514	1.12355	3.52193	1.09042	585
				2.00729	0.215789	0.51738	0.160186	704
				15.4476	1.66066	5.65032	1.74939	636
				20.1076	1.67432	6.31311	1.59883	510
				3.91122	0.325679	1.58404	0.401168	446
				22.329	0.942968	4.4506	0.652129	636
				25.0299	1.05703	9.19884	1.34787	590
				23.0596	1.25865	7.65214	1.3034	606
				23.0596	1.25865	7.65214	1.3034	636
				8.84337	0.482694	2.30844	0.3932	629
				27.3054	1	9.81253	1
				28.4623	1.45549	8.05461	1.64867	643
				10.6479	0.544506	1.71645	0.351334	636
				8.37065	0.751315	3.9647	0.862409	635
				13.912	1.24869	5.22978	1.13759	587
			mean	14.5001	1	5.32185	1
			median	13.7995	1	4.99004	1
			sd	7.35686	0.365725	3.46686	0.434547
			n	65	65	65	65	51
				PSP amplitude (mV)	Normalized amplitude	PSP slope (mV / ms)	Normalized PSP slope	Distance from pia (µm)
			L5A	0.36221	0.0449527	0.198864	0.0650932	579.32
				0.838525	0.104067	0.382924	0.125341	610.58
				3.05233	0.120091	1.10317	0.139482	585.67
				1.33361	0.0524693	0.339118	0.0428772	609.09
				5.99703	0.783088	2.24655	0.675247	639.76
				0.481045	0.0628145	0.0257329	0.00773453	666.85
				2.52003	0.176179	0.438835	0.107266	673.7
				1.3487	0.0942897	0.457334	0.111788	688.77
				2.37483	0.300755	0.627692	0.204035
				0.719205	0.0550136	0.313058	0.0559676	644.92
				5.48329	0.419428	2.13401	0.381511	671.19
				0.372518	0.0205644	0.128753	0.0103185	616.38
				2.0795	0.114796	0.760546	0.0609517	598.59
				4.8865	0.296347	1.53458	0.238813	708.43
				1.78867	0.108476	0.255252	0.0397226	727.46
				10.3819	1.01259	3.25519	0.637284	698.55
				3.48881	0.34028	1.28431	0.251436	681.76
				0.328685	0.0202043	0.10407	0.0152551	700.65
				0.20375	0.0125245	0.0514716	0.00754495	708.4
				0.188378	0.0134295	0.0773026	0.0113469
				0.141291	0.0100726	0.0145928	0.00214201
				0.177359	0.0170874	0.0104109	0.00376286
				1.61788	0.0827917	0.223213	0.0471021	679
				2.88494	0.270743	0.59467	0.149298	717
				2.07624	0.120485	0.515353	0.102979
				1.31236	0.120967	1.05208	0.275219
				0.089286	0.00659667	0.00202248	0.000366959	768
				0.962616	0.0539824	0.215946	0.0202351	724
				0.197326	0.0168868	0.0305084	0.00696488	702
				0.188619	0.00728615	0.0337234	0.00442748	740
				1.11582	0.0625795	0.2359	0.0359399	676
				0.253413	0.0272425	0.0298065	0.00922838	768
				0.648165	0.0539714	0.101111	0.0256069	583
				3.38007	0.142743	1.36521	0.200039	827
				0.113072	0.00617178	0.0131424	0.00223857	698
				0.64779	0.0237238	0.214403	0.0218499
				3.8661	0.197703	1.63181	0.334008	668
				0.172823	0.00883775	0.0220568	0.00451471	800
				0.100822	0.00904939	-0.00296053	-0.000643979	733
			mean	1.74809	0.138238	0.564661	0.1137
			median	0.962616	0.0625795	0.2359	0.0428772
			sd	2.0978	0.205508	0.739438	0.160533
			n	39	39	39	39	32
				PSP amplitude (mV)	Normalized amplitude	PSP slope (mV / ms)	Normalized PSP slope	Distance from pia (µm)
			L5B	0.175421	0.0217709	0.0397589	0.0130141	781.46
				1.13991	0.14147	0.596154	0.195137	750.2
				0.65761	0.0258729	0.17087	0.0216043	664.47
				6.95033	0.273453	1.36517	0.172609	794.64
				0.736463	0.0289753	0.167048	0.0211212	791.29
				2.61289	0.468712	1.05855	0.442771	727.7
				0.413666	0.0540162	0.136701	0.0410883	731.45
				0.556381	0.0726519	0.0525069	0.015782	737.7
				4.66725	0.326294	1.78975	0.437477	705.05
				2.37658	0.16615	0.784485	0.191755	770.09
				1.66	0.210228	0.601945	0.195666
				1.06083	0.134347	0.362132	0.117713
				0.152422	0.0116591	0.0154963	0.00277038	759.95
				13.6327	1.0428	2.04158	0.364987	998.7
				1.66598	0.127434	0.300963	0.0538052
				0.0631191	0.00348441	0.00100684	8.06904e-05	662.33
				1.55682	0.094415	0.36258	0.0564252	857.25
				6.81024	0.413014	2.69559	0.419491	837.29
				4.97579	0.485312	0.744373	0.145729	915.92
				4.1368	0.40348	1.26035	0.246744	925.41
				0.741654	0.0455895	0.635045	0.0930878	978.73
				0.190257	0.0116951	0.0425783	0.00624133	871.74
				0.138379	0.00986508	0.00230252	0.000337978
				0.112655	0.00803117	0.0554602	0.00814078
				7.46515	0.71922	3.30762	1.19549
				0.818056	0.0418624	0.276645	0.0583771	804
				2.30853	0.216649	0.685958	0.172217	802
				0.104036	0.00603726	0.00750462	0.00149958
				0.378961	0.0212517	0.102244	0.00958068	774
				4.69516	0.263299	0.637496	0.0597362	887
				-0.0112189	-0.00294318			804
				0.0516188	0.00441744	0.00093444	0.000213327	787
				0.155557	0.0133123	0.0235703	0.00538096	785
				9.9185	0.622831	3.7523	0.8383	846
				0.946265	0.0530703	0.490603	0.0747447	743
				4.31135	0.241797	1.21376	0.184919	848
				0.196612	0.0211363	0.0302473	0.00936486	839
				1.97403	0.212214	1.04773	0.324388	804
				0.158772	0.0170684	0.0594093	0.0183937	891
				0.143886	0.0119811	0.00154356	0.000390916	801
				4.76124	0.201071	2.02868	0.297255	898
				0.513351	0.0280201	0.191682	0.0326495	981
				2.39609	0.0877514	0.709963	0.0723526
				1.7716	0.0905951	0.37069	0.075875	857
			mean	2.27822	0.169349	0.702813	0.155691
			median	1.00355	0.0802016	0.36258	0.0597362
			sd	2.93262	0.220089	0.893047	0.232562
			n	44	44	43	43	36
				PSP amplitude (mV)	Normalized amplitude	PSP slope (mV / ms)	Normalized PSP slope	Distance from pia (µm)
			L6	0.0553816	0.00687323	-0.00052367	-0.000171411	937.75
				0.116731	0.0144871	0.000678682	0.00022215
				0.303609	0.0544627	0.0320553	0.0134081	1140.31
				6.90944	1.23945	2.46688	1.03185	1112.8
				0.605919	0.108693	0.0809612	0.0338645	1121.7
				4.31092	0.562917	2.76572	0.831293	904.41
				5.98	0.780864	1.06869	0.321216	877.32
				4.52649	0.591065	0.696483	0.209342	879.41
				1.14503	0.0800505	0.374452	0.0915288	1125.4
				0.447299	0.0312713	0.045743	0.0111812
				1.70258	0.21562	0.58156	0.189039
				6.14639	0.778396	1.60299	0.521061
				23.5837	2.98671	11.7095	3.80623
				30.5211	3.86528	10.0785	3.27608
				0.261643	0.0200136	0.00802091	0.00143395	1134.99
				0.0451616	0.00345451	0.00908518	0.00162422	1112.61
				0.975846	0.0746446	0.241298	0.0431385
				1.27976	0.0978915	0.36076	0.0644956
				0.440802	0.0337179	0.176168	0.0314947
				0.21398	0.0118125	0.00965401	0.000773692	803.01
				1.5616	0.0947047	0.298301	0.046422	980.22
				21.6322	1.31191	8.93828	1.39099	947.5
				4.79712	0.467885	1.6529	0.323595	1054.66
				0.668522	0.065204	0.106419	0.0208341	1070.42
				0.0800369	0.00491987	0.00214889	0.000314995	1154.94
				0.60368	0.0371083	0.23471	0.0344049	1134.97
				0.00919679	0.00065564
				0.118552	0.0084516	0.0338086	0.00496263
				0.356786	0.0471539	0.0115993	0.00361556
				2.64572	0.13539	1.02569	0.216439	981
				0.940516	0.0882648	0.248504	0.0623895	1091
				1.31784	0.097365	0.560371	0.101674	1058
				0.460952	0.0258497	0.0503421	0.00471728	997
				0.319214	0.0273178	0.0873271	0.0199362	902
				1.32911	0.083461	0.164732	0.0368027	940
				0.280065	0.0108186	0.00780886	0.00102521	1110
				2.03139	0.113928	0.653195	0.099516	973
				0.176238	0.00988413	0.00950212	0.00144767	1080
				11.2706	1.21162	2.15375	0.666823	1031
				0.0889507	0.00956244	0.00166918	0.000516793	1173
			mean	3.5065	0.385228	1.24486	0.346552
			median	0.804519	0.0773475	0.23471	0.0368027
			sd	6.71078	0.789159	2.70897	0.805811
			n	40	40	39	39	28
