# Supplementary material for: Pathway-, layer- and cell-type-specific thalamic input to mouse barrel cortex
Source: eLife. 2019 Dec 20;8:e52665. doi: 10.7554/eLife.52665 (PMC6924959; doi:10.7554/eLife.52665)
Supplement: Figure 3—source data 1. [file elife-52665-fig3-data1.xlsx]

## Sheet: Sheet1
	Figure 3
				PSP amplitude (mV)	Normalized amplitude	PSP slope (mV / ms)	Normalized PSP slope	Distance from pia (µm)
			L2	1.15182	0.263576	0.291495	0.120625
				0.892721	0.204285	0.506119	0.209441
				0.0732554	0.0167633	-0.00102521	-0.000424247
				0.56439	0.129151	0.194075	0.0803114
				0.642606	0.0955616	0.107692	0.0523114	192.55
				1.94402	0.289094	0.494144	0.24003	212.56
				0.2839	0.0185327	0.0530059	0.0091489	193.68
				0.960602	0.0627073	0.213014	0.0367666	205.6
				2.1573	0.145251	0.949931	0.0943747	265.1
				5.69028	0.383128	1.19087	0.118312	179.3
				14.386	0.96861	4.33381	0.43056	203.34
				3.27367	0.360126	1.10718	0.406962	245.07
				0.452089	0.0435612	0.204911	0.0652612	272.57
				0.104551	0.010074	0.000611763	0.000194838	257.57
				0.0762772	0.00734971	0.0126748	0.00403676
				0.227073	0.0592127	-0.00187862	-0.00259741	207.28
				0.0887311	0.023138	0.390625	0.540083	208.45
				0.539981	0.0324155	0.0445483	0.0100902
				0.207655	0.0124657	0.0290541	0.00658073
				0.114263	0.00685928	0.0196078	0.00444117	248.96
				0.212558	0.0189157	0.0273532	0.0101847	220.1
				0.89058	0.0792535	0.108693	0.0404705	185.12
				0.36681	0.0326428	0.0421454	0.0156924	150.2
				2.24244	0.171806	0.310023	0.126402
				1.78984	0.13713	0.375554	0.15312
				0.114091	0.0316704	0.00167977	0.00104964
				0.0727387	0.0137793	0.00705378	0.00665242	203
				6.71604	0.430327	1.29588	0.32787
				0.0653983	0.00839112	0.00336372	0.0017072	128
				0.237924	0.0257771	0.0273628	0.0113381	231
				0.204181	0.0221213	0.0134984	0.00559321	121
				0.223996	0.0108073	0.25	0.0448952	105
				0.29083	0.0188538	0.000784853	0.000183149	187
				0.147636	0.00957093	0.00470101	0.001097	142
				0.689647	0.0515556	0.0834279	0.0240354	234
				0.155907	0.0109647	0.0032849	0.000874517	249
				0.038563	0.00296382	0.00778905	0.00154918	239
				0.216312	0.0107083	0.0203366	0.00373331	202
			mean	1.27649	0.111029	0.334826	0.0842883
			median	0.287365	0.032043	0.0487771	0.0135152
			sd	2.59653	0.181146	0.742518	0.133619
			n	38	38	38	38	27
				PSP amplitude (mV)	Normalized amplitude	PSP slope (mV / ms)	Normalized PSP slope	Distance from pia (µm)
			L3	0.210434	0.0481544	0.0649725	0.0268867
				0.430974	0.0282021	0.0423114	0.0094836	312.75
				0.102475	0.00670573	0.0602273	0.0134992	254.36
				0.325149	0.0483526	0.0146463	0.00711444	397.61
				1.31511	0.0885466	0.441024	0.0438153	322.5
				4.10067	0.451101	1.40236	0.515458	292.58
				0.0137928	0.00244142	0.00019539	0.000180776	415.29
				0.080559	0.0142595	-5.1421e-05	-4.7575e-05	408.75
				0.341623	0.0205079	0.0360804	0.00817219	325.24
				0.857262	0.0762886	0.220448	0.0820815	302.17
				1.14197	0.087493	1.08482	0.442301	309.9
				3.96605	0.303863	1.08092	0.440711	252.59
				0.677421	0.188044	0.131947	0.0824497
				0.0481069	0.0133539	-0.000109649	-6.85164e-05
				4.62587	0.296401	0.478673	0.121109
				1.04651	0.137169	0.127479	0.111536	338
				0.106061	0.0111513	0.00010092	4.54434e-05	426
				0.106033	0.0111484	0.000837523	0.000377128	480
				0.0811226	0.0104087	0.0401515	0.0203782	240
				0.0916341	0.00992777	0.00615385	0.00254992	309
				0.0716405	0.0034565	0.00548132	0.00098434	312
				21.8622	2.20952	7.50883	6.41988	298
				0.816602	0.113683	0.751488	0.332465	389
				1.69237	0.235602	0.470294	0.208062	255
				1.58257	0.102594	0.417351	0.0973908	298
				0.744023	0.0482333	0.167837	0.0391655	248
				1.37174	0.102547	0.017634	0.0050803	346
				0.054138	0.00471613	-0.0137363	-0.00435918	254
				7.21961	0.383237	1.55822	0.244263	228
				0.0595048	0.00294573	0.00122826	0.000225479	239
				0.104417	0.00418673	0.0104902	0.00174522	412
			mean	1.78218	0.163362	0.520268	0.299127
			median	0.430974	0.0482333	0.0602273	0.0203782
			sd	4.01563	0.391824	1.34691	1.12687
			n	31	31	31	31	27
				PSP amplitude (mV)	Normalized amplitude	PSP slope (mV / ms)	Normalized PSP slope	Distance from pia (µm)
			L4	0.155507	0.0355851	0.0607955	0.0251582	579.3
				1.35181	0.309339	1.57946	0.653609	601.4
				0.0811015	0.00546058	0.00329381	0.000327236	493.12
				0.0747225	0.00503108	0.00183007	0.000181816	459.36
				0.548652	0.0603554	0.235405	0.0865269	467.63
				1.50444	0.165498	0.468147	0.172075	522.64
				0.055305	0.00532893			542.65
				0.0681935	0.0065708	0.0491071	0.0156399	535.15
				0.082245	0.0145579	-0.000837893	-0.000775224	550.86
				0.10805	0.0191256	0.00120488	0.00111476	581.36
				0.153379	0.0399959	-0.00149984	-0.00207369	563.86
				0.153521	0.00921596	-0.0006068	-0.00013744	548.14
				0.0435296	0.00387374	0.000842586	0.000313728	595.01
				0.0826796	0.00735774			602.5
				0.0749953	0.00574583	0.0165755	0.0067581	572.75
				0.0951374	0.00728903	0.0119226	0.00486104	584.43
				0.0567893	0.015764
				2.34959	0.307968	0.384851	0.336718	529
				0.435232	0.099401	0.12253	0.101903
				0.0579235	0.0101603	0.0107074	0.00722207
				0.0937086	0.0120236	0.00883162	0.00448234	526
				0.127103	0.0137705	0.0512868	0.0212513	604
				0.0457166	0.004953	0.0105779	0.00438309	598
				0.268531	0.029093	0.00175511	0.00072725	484
				0.0984953	0.00475219	0.00449299	0.000806855	566
				0.0428746	0.00206861	0.00361749	0.000649632	454
				0.146028	0.0108319	0.00182795	0.00047345
				16.5207	1.66967	5.60455	4.79176	590
				13.9732	1.41221	5.01058	4.28393	590
				0.107937	0.0143389	0.000911933	0.000451405	516
				7.47632	0.484673	2.08538	0.486634	652
				0.154426	0.0100111	0.00108919	0.000254168	481
				0.146765	0.0109716	0.000381008	0.000109767	487
				0.257659	0.0181208	0.0490897	0.0130688	504
				0.0676369	0.00698144	0.0301136	0.0137657	622
				0.464199	0.0479144	0.120613	0.0551351	335
				0.0811398	0.00401676	0.0119503	0.00219379	580
				0.0833182	0.00334075	0.003181	0.000529215	601
			mean	1.25496	0.128773	0.455542	0.316858
			median	0.107993	0.0114976	0.0107074	0.00448234
			sd	3.5354	0.348947	1.27125	1.05056
			n	38	38	35	35	34
				PSP amplitude (mV)	Normalized amplitude	PSP slope (mV / ms)	Normalized PSP slope	Distance from pia (µm)
			L5A	0.886757	0.20292	0.18154	0.0751243	730.2
				7.85322	1.79708	4.65152	1.92488	740.2
				21.4725	1.40511	3.82243	0.856752	678.35
				9.09085	0.594886	5.10063	1.14325	689.25
				8.41097	1.25079	2.66793	1.29594	617.67
				5.03807	0.749209	1.44943	0.704058	690.13
				11.246	0.73413	4.53064	0.781994	642.15
				19.3917	1.26587	7.05676	1.21801	635.35
				14.8522	1	10.0655	1	657.25
				9.06928	0.997682	2.55265	0.938266	602.66
				9.11143	1.00232	2.88856	1.06173	602.75
				4.03629	0.388918	1.19594	0.380891	735.2
				16.7202	1.61108	5.08377	1.61911	715.19
				0.149809	0.0265172	0.00319645	0.00295738	736
				11.1492	1.97348	2.15848	1.99704	742.14
				3.83487	1	0.723269	1	741.3
				3.81162	0.228814	1.04907	0.237614	749.29
				29.5046	1.77119	7.78096	1.76239	708.75
				9.42814	0.83902	2.04369	0.760944	721.87
				13.046	1.16098	3.32776	1.23906	695.74
				26.032	1.99446	4.88847	1.99312	718.05
				0.0722557	0.00553593	0.0168856	0.00688453	700.83
				1.68192	1.12696	0.596459	1.48435	683.84
				1.30296	0.873043	0.207203	0.515646	680.85
				3.60246	1	1.60033	1
				5.27882	1	1.06033	1	754
				15.6068	1	3.95243	1
				7.62932	1	1.14295	1	707
				9.51106	1	2.22079	1	672
				17.5697	1	3.82034	1	704
				4.37854	1	1.20241	1
				0.342656	0.0601053	0.0621981	0.041952
				11.0592	1.93989	2.903	1.95805
				15.2782	0.974112	3.4592	0.672115
				27.2069	1.73466	10.8136	2.10107
				4.56768	0.291226	1.16736	0.226815
				0.389118	0.0499269	0.00267114	0.00135569	673
				6.36321	0.816451	1.79798	0.912533	657
				16.6289	2.13362	4.1103	2.08611	657
				8.54035	0.925274	2.18189	0.904092	693
				11.545	1.2508	3.17589	1.31597	693
				7.60489	0.823925	1.88226	0.779939	686
				20.7263	1	5.56852	1	655
				13.4813	1	3.86092	1
				9.89455	1	1.16962	1	649
				12.9049	1.79655	4.38148	1.93841	629
				7.65977	1.06635	2.1742	0.961883	676
				0.984798	0.137098	0.225385	0.0997121	666
				13.0511	1.73378	3.54416	1.75435	631
				6.37979	0.847526	1.61791	0.800862	653
				3.1517	0.418689	0.898561	0.444786	633
				19.9326	1.29219	5.79138	1.35145	676
				10.9184	0.707813	2.77925	0.648553	695
				12.1142	0.905613	3.48818	1.00493	527
				6.06904	0.4537	1.48601	0.428115	539
				21.9471	1.64069	5.43897	1.56695	587
				1.8461	0.160819	0.455072	0.144416	669
				21.1125	1.83918	5.84715	1.85558	669
				4.13402	0.290741	0.925715	0.246447	709
				25.6855	1.80643	7.56554	2.01412	730
				12.8373	0.90283	2.77748	0.73943	741
				3.37011	0.347861	0.547396	0.250228	763
				12.8946	1.33097	2.63012	1.20229	703
				6.86068	0.708155	1.55682	0.71166	728
				15.627	1.61301	4.01603	1.83582	660
				24.2136	1.02126	4.85863	0.844286	740
				25.9873	1.09607	6.26692	1.089	731
				20.9278	0.882672	6.13862	1.06671	685
				18.8385	1	6.37928	1	611
				18.8385	1	6.37928	1	618
				21.0549	1.6182	8.71815	1.73397	733
				4.96765	0.381796	1.33757	0.266031	656
				18.3798	0.909876	5.03001	0.923392	741
				22.0209	1.09012	5.86463	1.07661	704
				24.94	1	6.01079	1	737
			mean	11.654	1	3.28438	1
			median	10.9184	1	2.77925	1
			sd	7.78443	0.521957	2.46425	0.56264
			n	75	75	75	75	66
				PSP amplitude (mV)	Normalized amplitude	PSP slope (mV / ms)	Normalized PSP slope	Distance from pia (µm)
			L5B	32.5374	2.12918	5.7657	1.29232	785.35
				0.639534	0.0418498	0.254519	0.0570475	771.42
				0.0904898	0.0134567			820.22
				0.814017	0.121052	0.504545	0.245082	732.7
				0.492094	0.0321234	0.0732668	0.012646	827.8
				0.8709	0.0568515	0.113805	0.0196429	772.4
				0.6449	0.0434212	0.0618242	0.00614217	748.87
				0.11058	0.0121645	0.00824111	0.00302915	765.21
				0.312125	0.0343358	0.0203764	0.00748966	800.22
				0.0647754	0.00624145	0.000935598	0.000297975	957.76
				0.10459	0.0100778	0.0373689	0.0119015	960.26
				0.137446	0.0243289	-0.000270646	-0.000250403	940.14
				0.124307	0.0220032	0.375	0.346952	965.3
				0.0671914	0.0175212	0.000259466	0.000358741	914.58
				0.0717101	0.0186995	0.0128055	0.017705	865.81
				1.79907	0.108	0.407687	0.0923409	932.81
				0.14442	0.00866964	0.00297713	0.000674319	917.29
				0.094083	0.00837253	0.000489319	0.000182193	869.2
				0.913915	0.0813302	0.136311	0.0507538	941.99
				0.22849	0.017506	0.00157102	0.000640532	919.47
				0.0807998	0.00619054	0.0253994	0.0103558	905.43
				0.0989495	0.0663005	0.00501495	0.0124803	844.45
				0.0453516	0.0303875			820.77
				0.175696	0.0332831	0.0196417	0.0185241	994
				0.313832	0.041135	0.0603865	0.052834	877
				1.72175	0.181026	0.241574	0.108778	882
				0.135504	0.0309474	0.00335038	0.00278638
				0.0768838	0.00490196	0.000106375	2.06685e-05
				0.224023	0.0142833	0.00959005	0.00186333
				0.136041	0.00656371	-0.000122337	-2.19695e-05	724
				0.0922641	0.00445154	0.000138632	2.48956e-05	794
				2.6978	0.200114	0.576203	0.14924
				3.46955	0.25736	1.14539	0.296664
				1.03588	0.104692	0.242769	0.207562	690
				7.86531	0.794913	3.0352	2.59503	835
				0.0883989	0.0123064	-1.25025e-05	-5.53121e-06	821
				0.171738	0.0239085	0.112723	0.0498697	835
				0.926076	0.123025	0.203886	0.100923	725
				0.52502	0.0697466	0.0644069	0.0318813	823
				0.0613479	0.00814979	0.00635059	0.00314353	857
				7.06003	0.457686	1.16987	0.272994	858
				3.56884	0.266794	0.540462	0.155705	975
				0.579815	0.0505095	0.154459	0.0490173	670
				0.323023	0.0227178	0.0580019	0.0154415	859
				0.271668	0.0191061	0.0751923	0.020018	997
				1.18378	0.122189	0.141409	0.0646416	812
				0.260821	0.0110007	0.00110344	0.000191745	832
				0.520159	0.0276115	0.0673459	0.010557	669
				0.118016	0.0090703	0.00172469	0.000343026	872
				0.268532	0.0206384	0.266741	0.0530526	833
				0.102792	0.00790024	0.00110302	0.000219382	987
				0.144849	0.0111326	0.00484622	0.000963873	987
			mean	1.43474	0.112447	0.320234	0.129001
			median	0.244656	0.0259702	0.0591942	0.0140437
			sd	4.6203	0.311116	0.912262	0.40148
			n	52	52	50	50	47
				PSP amplitude (mV)	Normalized amplitude	PSP slope (mV / ms)	Normalized PSP slope	Distance from pia (µm)
			L6	3.67639	0.841281	1.41631	0.586095	1092.8
				4.23918	0.970065	0.85402	0.353408	1077.8
				1.13733	0.260258	0.17878	0.0739822
				0.619744	0.141818	0.125391	0.0518888	952.76
				6.47196	1.481	5.67522	2.3485	967.76
				1.33746	0.0875208	0.222243	0.0498131	965.83
				0.0398621	0.0026085			972.42
				11.3556	1.68868	3.72834	1.81104	1057.79
				1.94127	0.288685	1.23381	0.59932	907.75
				0.709192	0.105464	0.368466	0.178982
				1.84445	0.120404	0.229098	0.0395426	1015.8
				0.163076	0.0106455	0.0114641	0.00197873	1024.69
				5.96484	0.656172	0.800827	0.294356	947.76
				0.218564	0.0210598	0.00570933	0.00181834	1155.31
				0.273128	0.0483454	0.113951	0.105428	1177.57
				1.85826	0.48457	1.09539	1.5145	1099.76
				0.509891	0.132962	0.0546349	0.0755389	1117.91
				1.81049	0.108685	0.259311	0.0587338	1126.69
				0.110499	0.00663334	0.00306113	0.000693346	1103.01
				0.764305	0.0680162	0.123518	0.0459906	1044.53
				1.32697	0.118088	0.150334	0.055975	1085.84
				1.40116	0.938838	0.626786	1.55982	1078.57
				0.0642571	0.0430551	0.00173319	0.00431324	1052.31
				-0.0153413	-0.000982984
				0.0607054	0.00795685	0.0069924	0.00611786	1107
				0.179909	0.0189157	0.00576957	0.00259798	1190
				0.0863369	0.00907753	0.00281523	0.00126767	1193
				1.0752	0.0611961	0.0752985	0.0197099
				2.98461	0.190293	0.257869	0.0501034
				0.14462	0.0069776	0.00742521	0.00133343	909
				0.00916005	0.000441953			988
				0.258455	0.0191714	0.149148	0.0386301
				9.77512	0.725088	2.27129	0.588277
				0.242363	0.0179777	0.00203516	0.000527118
				3.05455	0.30871	0.985409	0.842502	874
				4.32574	0.437184	0.895843	0.765925	1079
				0.102937	0.0143304	0.0252404	0.0111666	940
				0.0976754	0.0135979	0.0476563	0.0210835	1115
				1.36763	0.181684	0.421725	0.208753	951
				0.0482515	0.00420334	0.000365203	0.000115897	907
				0.0693011	0.00603704	4.48381e-05	1.42293e-05	1095
				0.150517	0.0105856	0.00161447	0.000429809	1103
				0.654791	0.0675872	0.288393	0.131831	1019
				1.57426	0.162494	0.501907	0.229434	1035
				0.102681	0.00789171	0.00104204	0.000207253	1275
				0.0689517	0.00529939	-0.00157691	-0.000313634	1300
				1.50439	0.0744734	0.134994	0.0247818	1110
			mean	1.61193	0.233512	0.530902	0.289914
			median	0.654791	0.0680162	0.142071	0.0499583
			sd	2.43792	0.382006	1.04627	0.534485
			n	47	47	44	44	39
