# Supplementary material for: Pathway-, layer- and cell-type-specific thalamic input to mouse barrel cortex
Source: eLife. 2019 Dec 20;8:e52665. doi: 10.7554/eLife.52665 (PMC6924959; doi:10.7554/eLife.52665)
Supplement: Figure 4—source data 1. [file elife-52665-fig4-data1.xlsx]

## Sheet: Sheet1
	Figure 4
				PSP amplitude (mV)	Normalized amplitude	PSP slope (mV / ms)	Normalized PSP slope
			L2	0.172721	0.00883865	0.00452576	0.000955018
				0.341716	0.0320691	0.0817094	0.020514
				1.17609	0.0659599	0.461075	0.070246
			mean	0.56351	0.0356226	0.182437	0.0305717
			median	0.341716	0.0320691	0.0817094	0.020514
			sd	0.438622	0.0234546	0.199531	0.0291682
			n	3	3	3	3
				PSP amplitude (mV)	Normalized amplitude	PSP slope (mV / ms)	Normalized PSP slope
			L3	23.0735	1.18074	16.5892	3.50063
				1.36648	0.12824	0.646566	0.162327
				3.03496	0.19058	1.68094	0.375539
				8.86702	0.556803	7.43542	1.66115
				7.00969	0.393131	4.01591	0.611834
				3.34238	0.182436	0.736931	0.125523
				0.135531	0.00739764	0.0202806	0.00345443
				12.0947	0.442941	11.0342	1.1245
				1.11955	0.0410009	0.685795	0.0698898
			mean	6.67154	0.34703	4.76059	0.848316
			median	3.34238	0.19058	1.68094	0.375539
			sd	6.90705	0.343001	5.46359	1.0731
			n	9	9	9	9
				PSP amplitude (mV)	Normalized amplitude	PSP slope (mV / ms)	Normalized PSP slope
			L4	27.0618	1.38483	20.9161	4.41369
				27.6897	1.41697	15.3365	3.23629
				34.4796	3.23581	27.4214	6.8844
				4.21349	0.395424	2.51093	0.630393
				8.01632	0.503383	6.65997	1.4879
				4.53482	0.284763	3.67634	0.82133
				22.2028	1.39422	17.3847	3.88391
				14.8155	0.830909	11.6318	1.77213
				22.5524	1.26483	10.4343	1.58969
				34.9211	2.90781	29.7772	7.54124
				10.1999	0.556737	7.98437	1.35999
				3.68119	0.200929	2.83073	0.482162
				3.71005	0.202505	2.02677	0.345223
				40.5133	1.48371	36.6079	3.73073
			mean	18.4708	1.14734	13.9428	2.72708
			median	18.5091	1.04787	11.033	1.68091
			sd	12.6132	0.915713	10.7447	2.24022
			n	14	14	14	14
				PSP amplitude (mV)	Normalized amplitude	PSP slope (mV / ms)	Normalized PSP slope
			L5A	10.8271	0.554056	8.98289	1.89555
				0.176909	0.0166024	0.00324517	0.000814732
				0.144348	0.0155178	0.0255284	0.00790382
				0.096832	0.00528535	0.00491431	0.000837063
				0.422646	0.0154785	0.0987485	0.0100635
			mean	2.33357	0.121388	1.82306	0.383035
			median	0.176909	0.0155178	0.0255284	0.00790382
			sd	4.24826	0.216373	3.58008	0.756269
			n	5	5	5	5
				PSP amplitude (mV)	Normalized amplitude	PSP slope (mV / ms)	Normalized PSP slope
			L5B	0.910969	0.0466171	0.367004	0.0774445
				0.169872	0.015942	0.0352643	0.00885346
				0.417183	0.0391514	0.223729	0.0561695
				0.458783	0.0430555	0.426339	0.107037
				0.240347	0.0150925	0.0753289	0.0168292
				0.654638	0.0703753	0.365625	0.113201
				0.615002	0.0661143	0.277121	0.0857991
				1.08381	0.0591574	0.650568	0.110812
				0.0809459	0.00441824	0.000865776	0.000147469
				0.862019	0.0470513	0.207644	0.0353684
				1.22926	0.0450189	0.823295	0.0839024
			mean	0.611167	0.0410904	0.31389	0.0632331
			median	0.615002	0.0450189	0.277121	0.0774445
			sd	0.361107	0.0203437	0.242015	0.0401524
			n	11	11	11	11
				PSP amplitude (mV)	Normalized amplitude	PSP slope (mV / ms)	Normalized PSP slope
			L6	0.0972236	0.00497523	0.0122859	0.00259256
				5.62053	0.52747	1.33896	0.33616
				4.57328	0.256487	2.03795	0.310486
				0.144709	0.00811585	0.00575246	0.000876402
				0.311887	0.0335287	0.0497374	0.0153992
			mean	2.14953	0.166116	0.688937	0.133103
			median	0.311887	0.0335287	0.0497374	0.0153992
			sd	2.43025	0.203595	0.84564	0.155607
			n	5	5	5	5
