# Supplementary material for: Pathway-, layer- and cell-type-specific thalamic input to mouse barrel cortex
Source: eLife. 2019 Dec 20;8:e52665. doi: 10.7554/eLife.52665 (PMC6924959; doi:10.7554/eLife.52665)
Supplement: Figure 5—source data 1. [file elife-52665-fig5-data1.xlsx]

## Sheet: Sheet1
	Figure 5
				PSP amplitude (mV)	Normalized amplitude	PSP slope (mV / ms)	Normalized PSP slope
			L2	2.43233	0.323124	1.17974	0.583969
				2.39634	0.168532	1.30922	0.348546
				0.0867856	0.00667004	0.00665478	0.00132358
			mean	1.63849	0.166109	0.831872	0.311279
			median	2.39634	0.168532	1.17974	0.348546
			sd	1.09732	0.129203	0.585906	0.239319
			n	3	3	3	3
				PSP amplitude (mV)	Normalized amplitude	PSP slope (mV / ms)	Normalized PSP slope
			L3	0.169666	0.0297611	-0.00235746	-0.00159008
				0.484987	0.0341085	0.153266	0.040803
				1.91435	0.134634	1.25833	0.334998
				0.177611	0.0136506
				-0.0178839	-0.0013745
				0.0963552	0.00476998	0.00259571	0.000476512
				1.26414	0.0625804	0.481618	0.0884136
			mean	0.584175	0.0397328	0.378691	0.0926202
			median	0.177611	0.0297611	0.153266	0.040803
			sd	0.673913	0.0435098	0.473672	0.125551
			n	7	7	5	5
				PSP amplitude (mV)	Normalized amplitude	PSP slope (mV / ms)	Normalized PSP slope
			L4	0.0630698	0.0144043	0.0193182	0.0160662
				0.121598	0.0213295	-0.000504739	-0.000340441
				0.135318	0.0179764	0.00981541	0.00485861
				0.0784252	0.00551554	0.0243154	0.00647332
				1.78961	0.184722	1.70685	0.780239
				0.0736165	0.00565791	0.000557878	0.000110957
				0.110359	0.00848182	0.015335	0.00305
				0.24753	0.0122538	0.00647942	0.00118947
			mean	0.327441	0.0337927	0.22277	0.101456
			median	0.115979	0.013329	0.0125752	0.0039543
			sd	0.555322	0.0572897	0.560986	0.256603
			n	8	8	8	8
				PSP amplitude (mV)	Normalized amplitude	PSP slope (mV / ms)	Normalized PSP slope
			L5A	5.65147	0.991322	2.21926	1.49687
				0.286675	0.0502855	0.0202181	0.0136369
				4.17507	0.554639	1.34485	0.665697
				37.7862	2.65745	21.3024	5.67121
				23.9523	1.68453	10.9728	2.92121
				24.9684	2.57723	10.1605	4.64462
				3.13093	0.240632	1.8679	0.371509
				11.7752	0.582923	5.48901	1.00765
			mean	13.9658	1.16738	6.67212	2.09905
			median	8.71335	0.787123	3.85413	1.25226
			sd	12.5623	0.957225	6.72353	1.96398
			n	8	8	8	8
				PSP amplitude (mV)	Normalized amplitude	PSP slope (mV / ms)	Normalized PSP slope
			L5B	0.0693183	0.0158313	0.00102374	0.000851403
				0.0927307	0.0123189	0.0726305	0.035952
				1.40397	0.18651	0.829261	0.410483
				2.47442	0.328716	0.821659	0.40672
				0.166812	0.0117316	0.0229978	0.00612255
				0.172003	0.0120968	0.00158095	0.000420885
				1.31885	0.136131	0.254372	0.11628
				0.123704	0.00612386	0.00903116	0.00165791
				2.92151	0.144627	1.13727	0.208776
				0.291129	0.0144121	0.120941	0.0222018
			mean	0.903445	0.0868499	0.327077	0.120946
			median	0.231566	0.0151217	0.0967855	0.0290769
			sd	1.01869	0.103823	0.408853	0.157026
			n	10	10	10	10
				PSP amplitude (mV)	Normalized amplitude	PSP slope (mV / ms)	Normalized PSP slope
			L6	0.109985	0.0251192	0.00269747	0.00224337
				0.0828508	0.0110064	0.0258523	0.0127968
				0.135659	0.0180217	0.00986001	0.00488069
				0.0698224	0.00927559	-3.96102e-05	-1.9607e-05
				0.0940376	0.00661355	0.0456439	0.0121515
				0.42415	0.0437805	0.0281484	0.0128673
				1.56706	0.161751	1.03485	0.473054
				0.0741035	0.00366843	0.0172436	0.00316552
				0.0568566	0.00281463	0.00149437	0.00027433
				0.06303	0.00312024	-0.000477743	-8.77023e-05
			mean	0.267756	0.0285172	0.116527	0.0521326
			median	0.0884442	0.010141	0.0135518	0.0040231
			sd	0.445246	0.046028	0.306443	0.140399
			n	10	10	10	10
