# Supplementary material for: Pathway-, layer- and cell-type-specific thalamic input to mouse barrel cortex
Source: eLife. 2019 Dec 20;8:e52665. doi: 10.7554/eLife.52665 (PMC6924959; doi:10.7554/eLife.52665)
Supplement: Figure 6—source data 1. [file elife-52665-fig6-data1.xlsx]

## Sheet: Sheet1
	Figure 6
				VPM						POM
				PSP amplitude (mV)	Normalized amplitude	PSP slope (mV / ms)	Normalized PSP slope			PSP amplitude (mV)	Normalized amplitude	PSP slope (mV / ms)	Normalized PSP slope
			L2	0.145594	0.00816473	0.0286153	0.00268138		L2	0.80865	0.0518138	0.0609648	0.0154247
				0.110921	0.00949242	0.0706439	0.0161276			0.0391915	0.00513696	0.0553571	0.0484336
				0.120261	0.00464556	0.25	0.032822			0.049975	0.00655039	-0.00111817	-0.000978319
			mean	0.125592	0.00743424	0.11642	0.0172103			0.0707361	0.00341287	0.00352658	0.000633307
			median	0.120261	0.00816473	0.0706439	0.0161276			0.19898	0.0173338
			sd	0.0146485	0.00204503	0.0960013	0.0123287		mean	0.233506	0.0168496	0.0296826	0.0158783
	s		n	3	3	3	3		median	0.0707361	0.00655039	0.0294419	0.00802898
									sd	0.29323	0.0181468	0.0285945	0.0198533
				PSP amplitude (mV)	Normalized amplitude	PSP slope (mV / ms)	Normalized PSP slope		n	5	5	4	4
			L3	0.276559	0.0254919	0.0188907	0.00494169
				4.23217	0.237335	1.05976	0.0993042			PSP amplitude (mV)	Normalized amplitude	PSP slope (mV / ms)	Normalized PSP slope
				0.137054	0.00529425	-0.00182956	-0.0002402		L3	0.0862971	0.0163478	0.00150306	0.00141754
			mean	1.54859	0.0893738	0.35894	0.0346686			0.0663504	0.00320126
			median	0.276559	0.0254919	0.0188907	0.00494169			4.18483	0.422942	1.19613	1.02266
			sd	1.89843	0.104949	0.495626	0.0457533			0.0895237	0.012463	0.000197494	8.73732e-05
			n	3	3	3	3			0.300792	0.0418746	0.00771276	0.00341219
										0.0190197	0.00165686	0.000862098	0.000273586
				PSP amplitude (mV)	Normalized amplitude	PSP slope (mV / ms)	Normalized PSP slope			0.498689	0.0264718	0.1078	0.0168985
			L4	0.1016	0.00978852	0.0299531	0.0108261		mean	0.749357	0.074994	0.219034	0.174125
				0.245817	0.0324878	0.00942003	0.00293627		median	0.0895237	0.0163478	0.00460791	0.00241486
				1.0341	0.0953186	0.322415	0.084342		sd	1.59204	0.161496	0.468565	0.407045
				1.2141	0.11191	0.310616	0.0812555		n	7	7	6	6
				4.69849	0.263486	1.36562	0.127965
				2.9377	0.164743	0.921429	0.086342			PSP amplitude (mV)	Normalized amplitude	PSP slope (mV / ms)	Normalized PSP slope
				0.462253	0.0395587	0.0979839	0.0223691		L4	0.25633	0.033598	0.00239824	0.00209829
				0.788609	0.0304632	0.296645	0.038946			0.248352	0.0119825	0.0121433	0.0021807
			mean	1.43533	0.0934695	0.419261	0.0568728			0.250035	0.0185468	0.0525855	0.0136199
			median	0.911355	0.0674387	0.303631	0.0601007		mean	0.251572	0.0213758	0.0223757	0.00596631
			sd	1.48636	0.0805655	0.448155	0.0415526		median	0.25633	0.033598	0.0525855	0.0136199
			n	8	8	8	8		sd	0.00343338	0.00904839	0.0217289	0.00541204
									n	3	3	3	3
				PSP amplitude (mV)	Normalized amplitude	PSP slope (mV / ms)	Normalized PSP slope
			L5A	0.27446	0.0264425	0.0517549	0.0187061			PSP amplitude (mV)	Normalized amplitude	PSP slope (mV / ms)	Normalized PSP slope
				0.404582	0.0534707	0.0675029	0.021041		L5A	0.112707	0.0118501	0.00273286	0.00123058
				0.196093	0.018075	0.0129246	0.00338101			0.119546	0.0125691	0.0261549	0.0117773
				0.350426	0.0196515	0.0286825	0.00268768			4.7431	0.351828	0.927895	0.24033
				0.269761	0.0230856	0.0383029	0.0087443			2.95674	0.298825	1.03535	0.885197
				0.279052	0.0107795	0.0153785	0.00201902			0.379932	0.0528921	0.101984	0.0451185
			mean	0.295729	0.0252508	0.0357577	0.00942984		mean	1.6624	0.145593	0.418822	0.236731
			median	0.276756	0.0213685	0.0334927	0.00606266		median	0.379932	0.0528921	0.101984	0.0451185
			sd	0.0660465	0.0135076	0.0193944	0.00772768		sd	1.87578	0.148451	0.461944	0.335649
			n	6	6	6	6		n	5	5	5	5
				PSP amplitude (mV)	Normalized amplitude	PSP slope (mV / ms)	Normalized PSP slope			PSP amplitude (mV)	Normalized amplitude	PSP slope (mV / ms)	Normalized PSP slope
			L5B	0.0754408	0.00726825	0.0113567	0.00410471		L5B	0.114368	0.0216655	0.0146875	0.0138518
				0.156001	0.0143794	0.0100286	0.00262343			0.115208	0.0151007	0.00151268	0.00132349
				0.0785486	0.00440491	0.00523317	0.000490371			1.09643	0.11528	0.23653	0.106507
				-0.00267477	-0.000149998					0.133203	0.00642677	0.00691728	0.00124221
				0.130743	0.0111887	0.00444395	0.00101453			0.145185	0.00700487	0.00153115	0.000274965
				0.148484	0.012707					0.557239	0.0413342	0.0937574	0.0242837
				0.140655	0.012037	0.00932661	0.00212921			1.12749	0.113951	0.344384	0.294441
				0.0499242	0.00192852	0.00470938	0.000618286			0.207626	0.0209838	0.0686126	0.0586622
				0.00566142	0.000218695					0.0733726	0.0102145	0.046875	0.0207379
			mean	0.0869759	0.00710917	0.00751641	0.00183009			0.175044	0.0243687	0.0203083	0.00898455
			median	0.0785486	0.00726825	0.00727989	0.00157187			0.135204	0.0117781	0.00944995	0.00299893
			sd	0.0573206	0.00536936	0.00279489	0.0012794			0.111074	0.00967597	0.000480365	0.000152443
			n	9	9	6	6			0.0779851	0.00679353	0.00310974	0.000986871
									mean	0.313033	0.0311213	0.0652428	0.0411113
				PSP amplitude (mV)	Normalized amplitude	PSP slope (mV / ms)	Normalized PSP slope		median	0.135204	0.0151007	0.0146875	0.00898455
			L6	0.0461278	0.00425185	0.3125	0.0817482		sd	0.360667	0.036791	0.102164	0.0788447
				0.13666	0.00766372	0.00699716	0.000655665		n	13	13	13	13
				0.376176	0.0321925	0.46875	0.107013
				0.0898402	0.00347044					PSP amplitude (mV)	Normalized amplitude	PSP slope (mV / ms)	Normalized PSP slope
			mean	0.162201	0.0118946	0.262749	0.0631388		L6	0.0556771	0.0105472	0.00377018	0.00355566
			median	0.11325	0.00595778	0.3125	0.0817482			0.105084	0.0199067	0.00133053	0.00125483
			sd	0.127619	0.0118246	0.191764	0.0453702			0.212595	0.0402733	0.00668407	0.00630374
			n	4	4	3	3			0.0200569	0.00128514	-0.00329937	-0.000834771
										0.135229	0.0177249	6.93854e-05	6.07074e-05
										0.0438891	0.00461454
										0.0211926	0.00222821
										0.115939	0.00559382	0.00122724	0.000220388
										0.150553	0.00726384	-0.00212758	-0.000382072
										0.324819	0.024094	0.0205631	0.00532596
										0.203074	0.0150634	0.005761	0.00149213
										0.256576	0.019032	0.00231776	0.000600313
										0.0970196	0.00980535
										0.102065	0.014209	0.00019961	8.83092e-05
										0.0618465	0.00538765
										0.0277592	0.00241819	0.00774647	0.00245833
										0.0551792	0.00480683	0.00036497	0.000115823
										0.206611	0.0179986	0.00559982	0.0017771
									mean	0.121954	0.0123474	0.00358623	0.00157403
									median	0.103574	0.0101763	0.00182415	0.000927569
									sd	0.0854854	0.00960605	0.00567243	0.00207603
									n	18	18	14	14
