# Supplementary material for: Pathway-, layer- and cell-type-specific thalamic input to mouse barrel cortex
Source: eLife. 2019 Dec 20;8:e52665. doi: 10.7554/eLife.52665 (PMC6924959; doi:10.7554/eLife.52665)
Supplement: Figure 7—source data 1. [file elife-52665-fig7-data1.xlsx]

## Sheet: Sheet1
	Figure 7
				VPM						POM
				PSP amplitude (mV)	Normalized amplitude	PSP slope (mV / ms)	Normalized PSP slope			PSP amplitude (mV)	Normalized amplitude	PSP slope (mV / ms)	Normalized PSP slope
			L1	1.19983	0.0506699	0.0623555	0.00913671		L1	0.0980451	0.00393124	0.000300107	4.9928e-05
				0.340931	0.0174344	0.00432977	0.000886243			0.190255	0.00762853	0.0188142	0.00313006
				0.0437664	0.00392829	0.06875	0.0149546		mean	0.14415	0.00577988	0.00955713	0.00159
			mean	0.528177	0.0240108	0.0451451	0.00832586		median	0.14415	0.00577988	0.00955713	0.00159
			median	0.340931	0.0174344	0.0623555	0.00913671		sd	0.0461051	0.00184864	0.00925702	0.00154007
			sd	0.490183	0.0196406	0.0289786	0.00577194		n	2	2	2	2
			n	3	3	3	3
										PSP amplitude (mV)	Normalized amplitude	PSP slope (mV / ms)	Normalized PSP slope
				PSP amplitude (mV)	Normalized amplitude	PSP slope (mV / ms)	Normalized PSP slope		L2	0.368623	0.102325	0.0942799	0.0589126
			L2	0.816801	0.0285135	0.273246	0.021172			1.05332	0.0599512	0.128226	0.0335639
				1.81174	0.0632457	0.64523	0.0499947			3.56344	0.202818	0.316332	0.0828021
				0.0707393	0.0185578	-0.000338877	-0.0002291			-0.026933	-0.0017172
				0.012389	0.00103161					0.241246	0.0153814	0.00157664	0.000306339
				0.148776	0.0123883	-0.00067929	-0.000172034			0.0511123	0.00655811	0.21875	0.111023
				0.153938	0.0128181	0.00794228	0.00201143			0.880403	0.0570745	0.18563	0.0433178
				20.6219	0.870878	7.05543	1.03381			2.48762	0.185966	0.381791	0.109993
				5.42855	0.229251	1.41325	0.207077			0.254575	0.0107372	0.0282054	0.00490126
				0.166189	0.00849851					0.172648	0.00728179	0.033134	0.0057577
				0.435396	0.0390793					0.196929	0.00830589	0.0028216	0.00049031
			mean	2.96664	0.128426	1.34201	0.187666			0.186822	0.00787962	0.0126674	0.00220121
			median	0.300793	0.0235357	0.273246	0.021172			27.2014	1.44392	2.37813	0.372789
			sd	6.09049	0.255564	2.38029	0.352148			8.06646	0.428191	0.857486	0.134418
			n	10	10	7	7		mean	3.19269	0.181048	0.356848	0.0738828
									median	0.311599	0.036228	0.128226	0.0433178
				PSP amplitude (mV)	Normalized amplitude	PSP slope (mV / ms)	Normalized PSP slope		sd	6.98679	0.368684	0.625784	0.0976234
			L3	0.816801	0.0285135	0.273246	0.021172		n	14	14	13	13
				20.457	1.18713	7.70398	1.53942
				15.0218	1.10985	5.55852	1.00854			PSP amplitude (mV)	Normalized amplitude	PSP slope (mV / ms)	Normalized PSP slope
				0.176502	0.0463036	0.0574777	0.0388582		L3	0.650245	0.1805	0.0878218	0.0548771
				0.0719657	0.0188796	0.0388158	0.0262417			3.55573	0.202379	0.607501	0.159017
				0.0219063	0.00574691					3.33753	0.189959	0.478004	0.125121
				1.57814	0.131409	0.628814	0.159251			3.18323	0.181177	0.487456	0.127595
				0.327158	0.0272418	0.106743	0.0270334			0.319666	0.0410157	0.0819973	0.0416163
				18.9776	0.80144	4.76113	0.69763			0.14166	0.0181761	0.0224745	0.0114065
				36.8441	1.55595	13.8908	2.03536			2.85953	0.309806	1.11379	0.461511
				7.55193	0.386187	3.19699	0.654378			0.114147	0.0123668	0.5	0.207181
				1.31817	0.0674079	0.407965	0.0835048			4.05674	0.262989	1.27959	0.298598
				0.514241	0.026297	0.15813	0.0323669			2.64763	0.197928	0.631079	0.181812
				0.0843297	0.00431241	0.000614148	0.000125708			3.72387	0.278384	0.495689	0.142807
				0.712904	0.0364562	0.18437	0.0377379			2.06357	0.154265	0.527476	0.151964
				0.70156	0.0629691	0.0908391	0.0197595			0.501809	0.0211648	-0.000434417	-7.54888e-05
				0.0802003	0.00719844	0.00182615	0.000397227			0.120199	0.00506965	0.00138077	0.000239936
			mean	6.19155	0.323723	2.31626	0.398861			3.53521	0.187659	0.731917	0.114734
			median	0.712904	0.0463036	0.228808	0.038298			21.9851	1.16703	1.64697	0.258175
			sd	10.2137	0.49133	3.79942	0.609185			0.193685	0.00776605	0.00286709	0.000476991
			n	17	17	16	16			0.0965311	0.00387054	0.00157293	0.000261684
										0.225581	0.00904494	-0.000522559	-8.69369e-05
				PSP amplitude (mV)	Normalized amplitude	PSP slope (mV / ms)	Normalized PSP slope			0.167852	0.00673023	0.00708601	0.00117888
			L4	14.8147	0.517162	2.71684	0.210511		mean	2.67397	0.171864	0.435185	0.11692
				3.14985	0.182788	0.655305	0.130944		median	1.35691	0.167383	0.48273	0.119927
				3.20026	0.236443	1.2005	0.217818		sd	4.67693	0.250732	0.466943	0.120442
				0.0865159	0.0226967	0.0596591	0.0403329		n	20	20	20	20
				0.158316	0.0415328	0.00149873	0.00101322
				0.392732	0.032702	0.0158453	0.00401291			PSP amplitude (mV)	Normalized amplitude	PSP slope (mV / ms)	Normalized PSP slope
				2.38509	0.100724	0.202684	0.0296985		L4	0.305561	0.08482	0.128906	0.0805496
				0.863021	0.0774612	0.220409	0.0479437			2.14689	0.275463	0.359435	0.182425
			mean	3.13131	0.151439	0.634093	0.0852842			2.27616	0.246602	0.38485	0.159467
			median	1.62406	0.0890927	0.211546	0.0441383			0.178212	0.0193077	0.0138126	0.00572341
			sd	4.58008	0.155225	0.875268	0.0833239			0.453108	0.0490903	0.00224113	0.000928638
			n	8	8	8	8			0.213304	0.0231097	0.00048854	0.000202432
										6.32773	0.410213	2.05519	0.479589
				PSP amplitude (mV)	Normalized amplitude	PSP slope (mV / ms)	Normalized PSP slope			0.130165	0.00843831	0.0205814	0.00480278
			L5A	0.861342	0.0499843	0.175353	0.0350393			1.36908	0.102348	0.24566	0.0707741
				0.221809	0.0163877	0.0212371	0.00385326			0.214503	0.0090471	4.80978e-05	8.35797e-06
				0.342487	0.0285182	0.00442161	0.0011198			24.8037	1.31665	4.09275	0.64157
				0.409177	0.0209243	0.02785	0.0057005			0.591608	0.0237213	0.109673	0.018246
				0.576657	0.0294888	0.185049	0.0378769		mean	3.25083	0.214067	0.617803	0.137024
			mean	0.482294	0.0290607	0.0827821	0.016718		median	0.522358	0.0669552	0.11929	0.04451
			median	0.409177	0.0285182	0.02785	0.0057005		sd	6.71379	0.354769	1.18185	0.201434
			sd	0.221507	0.0115332	0.0799669	0.0162084		n	12	12	12	12
			n	5	5	5	5
										PSP amplitude (mV)	Normalized amplitude	PSP slope (mV / ms)	Normalized PSP slope
				PSP amplitude (mV)	Normalized amplitude	PSP slope (mV / ms)	Normalized PSP slope		L5A	0.278539	0.0773192	0.154167	0.096334
			L5B	0.138464	0.00803515	0.0198661	0.00396967			2.75653	0.175751	0.676068	0.131359
				-0.0369138	-0.009684					0.801414	0.0510967	0.282927	0.0549721
				0.562289	0.0468207	0.116815	0.0295842			6.25092	0.802043	1.57445	0.799084
				13.8527	0.585008	3.94802	0.578488			0.698515	0.0756781	0.0511162	0.0211806
				0.551249	0.0281895	0.093041	0.0190442			2.83189	0.183585	0.829881	0.193657
			mean	3.01355	0.131674	1.04443	0.157771			2.21444	0.165544	0.439516	0.126623
			median	0.551249	0.0281895	0.104928	0.0243142			13.2556	0.990946	4.65261	1.3404
			sd	5.42457	0.22746	1.67676	0.243071			4.25383	0.179414	1.04026	0.180766
			n	5	5	4	4			11.1975	0.594393	2.03672	0.319271
									mean	4.45392	0.329577	1.17377	0.326365
				PSP amplitude (mV)	Normalized amplitude	PSP slope (mV / ms)	Normalized PSP slope		median	2.79421	0.177583	0.752975	0.156062
			L6	0.14349	0.0106014	0.00397727	0.000721636		sd	4.26169	0.321067	1.30476	0.398526
									n	10	10	10	10
										PSP amplitude (mV)	Normalized amplitude	PSP slope (mV / ms)	Normalized PSP slope
									L5B	3.18654	0.181366	0.601082	0.157337
										0.147276	0.00838239	0.0091787	0.00240259
										4.5414	0.294409	0.908896	0.212095
										4.34145	0.324552	0.685779	0.197571
										0.190436	0.0142363	0.0276042	0.00795269
										12.6917	0.5353	3.17226	0.551244
										1.23063	0.0519044	0.265502	0.0461363
									mean	3.76135	0.20145	0.810043	0.16782
									median	3.18654	0.181366	0.601082	0.157337
									sd	4.02216	0.1814	1.01412	0.176351
									n	7	7	7	7
										PSP amplitude (mV)	Normalized amplitude	PSP slope (mV / ms)	Normalized PSP slope
									L6	2.75419	0.175602	0.144724	0.0281197
										0.0698302	0.00452694	0.00902993	0.00210718
									mean	1.41201	0.0900645	0.0768771	0.0151134
									median	1.41201	0.0900645	0.0768771	0.0151134
									sd	1.34218	0.0855375	0.0678472	0.0130062
									n	2	2	2	2
